# Supplementary material
Source: PubMed Central journal article supplement (PMC5840218)
Supplement: 40846_2017_257_MOESM1_ESM.pdf [file 40846_2017_257_MOESM1_ESM.pdf]

## SUPPLEMENTARY MATERIALS

### Markov I<sub>Ks</sub> Models

The I<sub>Ks</sub> Markov model paradigm was based on the work of Silva and Rudy. Figure 1 was reproduced from reference with permission [1].

Using experimental data, we changed transition rates equations from WT for V141M KCNQ1 of heterozygous expression. Because experiments were conducted at room temperature, model validation for I<sub>Ks</sub> was set at room temperature (T=298). The transition rates equations for WT and V141M KCNQ1 I<sub>Ks</sub> Markov model were listed in the Table 1.

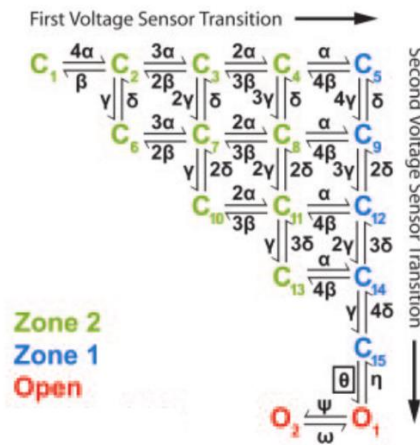

Figure 1. The I<sub>Ks</sub> Markov model. The model of I<sub>Ks</sub> contains 15 closed (C<sub>1</sub> to C<sub>15</sub>) states to account for 2 transitions of each of the 4 voltage sensor domains before channel opening and 5 open states (O<sub>1</sub> to O<sub>5</sub>).

Table 1. Equations of transition rates for WT and V141M KCNQ1 I<sub>Ks</sub> Markov models

| Transition rates | WT                                                           | V141M KCNQ1                                                    |
|------------------|--------------------------------------------------------------|----------------------------------------------------------------|
| α                | $0.0025 \cdot \exp(0.301 \cdot V_m \cdot F / (R \cdot T))$   | $0.002875 \cdot \exp(0.301 \cdot V_m \cdot F / (R \cdot T))$   |
| β                | $0.0006 \cdot \exp(-0.0964 \cdot V_m \cdot F / (R \cdot T))$ | $0.000525 \cdot \exp(-0.0964 \cdot V_m \cdot F / (R \cdot T))$ |
| γ                | $0.0126 \cdot \exp(0.8622 \cdot V_m \cdot F / (R \cdot T))$  | $0.0283 \cdot \exp(0.8622 \cdot V_m \cdot F / (R \cdot T))$    |
| δ                | $0.0089 \cdot \exp(-0.3692 \cdot V_m \cdot F / (R \cdot T))$ | $0.00825 \cdot \exp(-0.3692 \cdot V_m \cdot F / (R \cdot T))$  |
| η                | $0.0668 \cdot \exp(-0.3494 \cdot V_m \cdot F / (R \cdot T))$ | $0.0574 \cdot \exp(-0.3494 \cdot V_m \cdot F / (R \cdot T))$   |
| θ                | 0.0011                                                       | 0.011                                                          |
| ω                | $0.011 \cdot \exp(-0.3356 \cdot V_m \cdot F / (R \cdot T))$  | $0.00975 \cdot \exp(-0.3356 \cdot V_m \cdot F / (R \cdot T))$  |
| ψ                | $0.02 \cdot \exp(1.0348 \cdot V_m \cdot F / (R \cdot T))$    | $0.03 \cdot \exp(1.0348 \cdot V_m \cdot F / (R \cdot T))$      |

\*Symbols indicating transition rates are illustrated in Figure 1. V<sub>m</sub>= membraneous potential [1].

1. Silva, J. and Y. Rudy, Subunit interaction determines I<sub>Ks</sub> participation in cardiac repolarization and repolarization reserve. Circulation, 2005. 112(10): p. 1384-91.
